# Supplementary material for: Net ozone production and its relationship to nitrogen oxides and volatile organic compounds in the marine boundary layer around the Arabian Peninsula
Source: Copernicus journal article supplement (doi:10.5194/acp-20-6769-2020), 2020-06-09
Supplement: Supplementary file [file acp-20-6769-2020-supplement.pdf]

Supplement of Atmos. Chem. Phys., 20, 6769–6787, 2020  
<https://doi.org/10.5194/acp-20-6769-2020-supplement>  
© Author(s) 2020. This work is distributed under  
the Creative Commons Attribution 4.0 License.

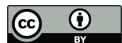

*Supplement of*

## **Net ozone production and its relationship to nitrogen oxides and volatile organic compounds in the marine boundary layer around the Arabian Peninsula**

**Ivan Tadic et al.**

*Correspondence to:* Ivan Tadic ([i.tadic@mpic.de](mailto:i.tadic@mpic.de))

The copyright of individual parts of the supplement might differ from the CC BY 4.0 License.

Figure S1 shows a day to day calculation of the correction factor to scale the fractional noontime integral to a diurnal value. An average  $\pm$  standard deviation of  $(46.1 \pm 2.8)$  % of the diurnal integral within  $\pm 2$ h around noontime was estimated.

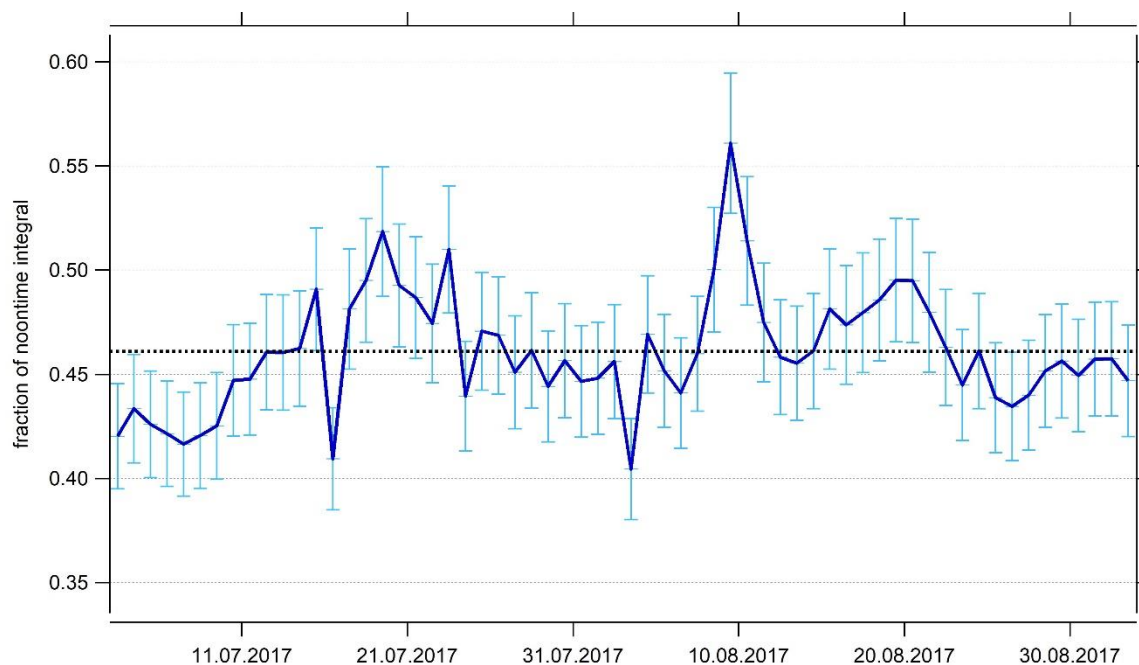

5 **Figure S1: Ratio of the noontime actinic flux ( $\pm 2$ h around noon) with regard to the total actinic flux  $j(\text{NO}_2)$  of that particular day. Dashed line represents the campaign average of  $(46.1 \pm 2.8)$  %. The errors bars are represented by the relative uncertainty (6 %) of the campaign average.**

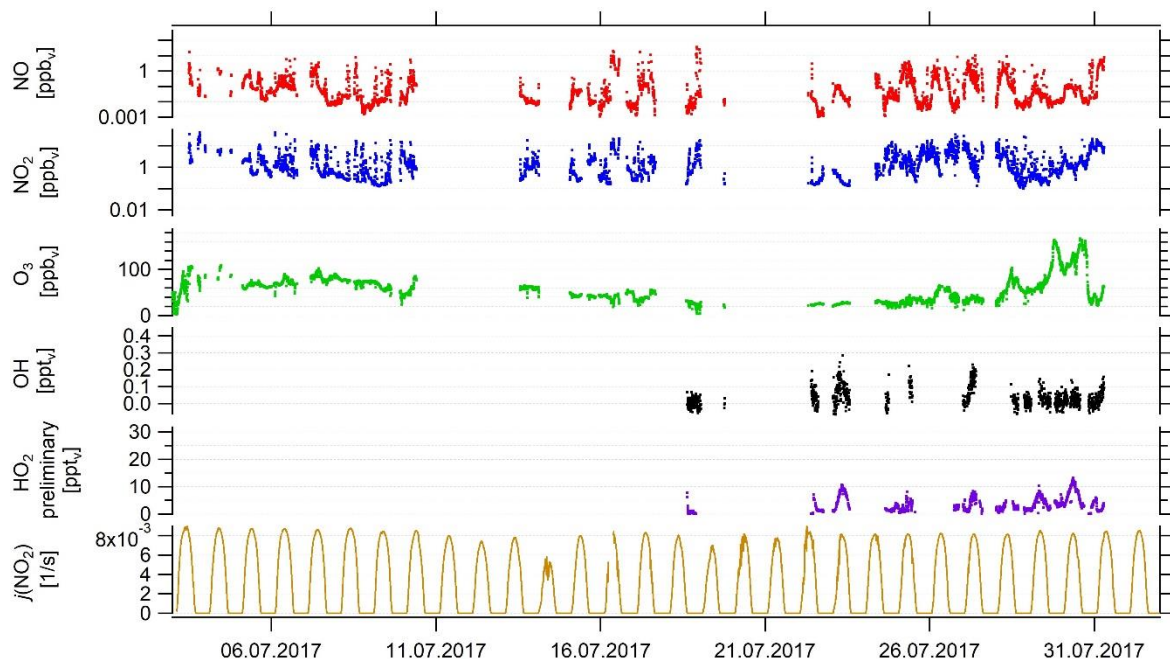

**Figure S2:** Timeline of NO, NO<sub>2</sub> (both CLD), O<sub>3</sub>, OH, HO<sub>2</sub> preliminary (HO<sub>2</sub>\*) and  $j(\text{NO}_2)$  data during the first leg. See Table ST2 for additional information on the ship cruise. Note that HO<sub>2</sub> data are preliminary.

10

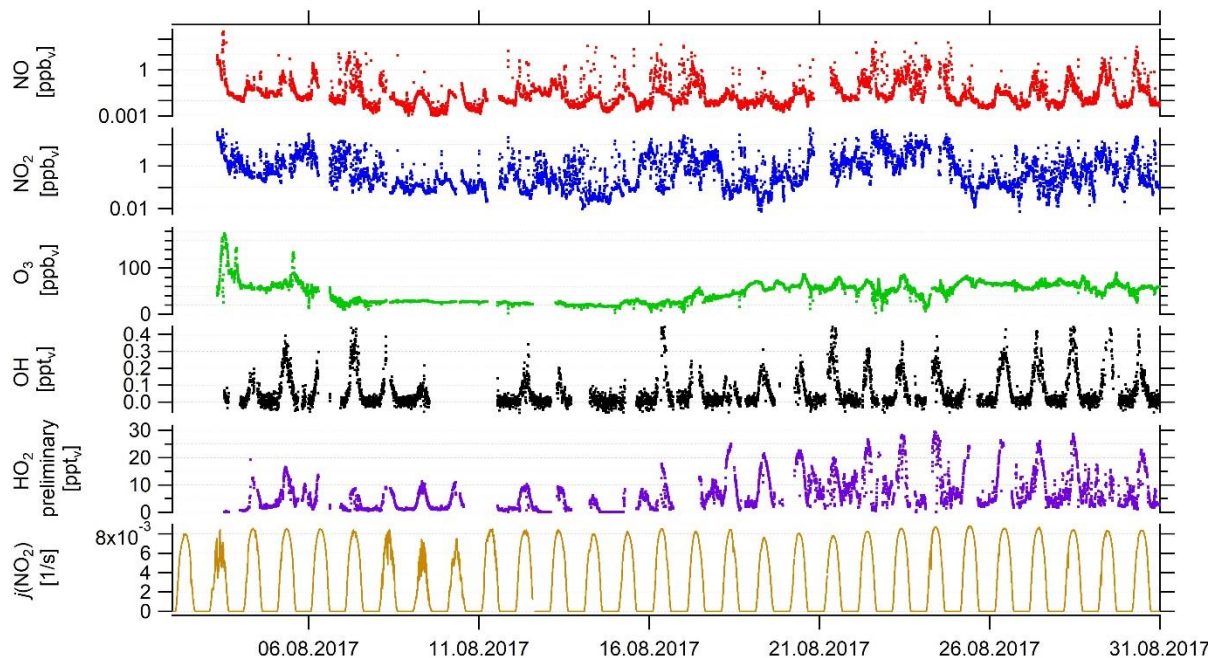

**Figure S3:** Timeline of NO, NO<sub>2</sub> (both CLD), O<sub>3</sub>, OH, HO<sub>2</sub> preliminary (HO<sub>2</sub>\*) and  $j(\text{NO}_2)$  data during the second leg. See Table ST2 for additional information on the ship cruise. Note that HO<sub>2</sub> data are preliminary.

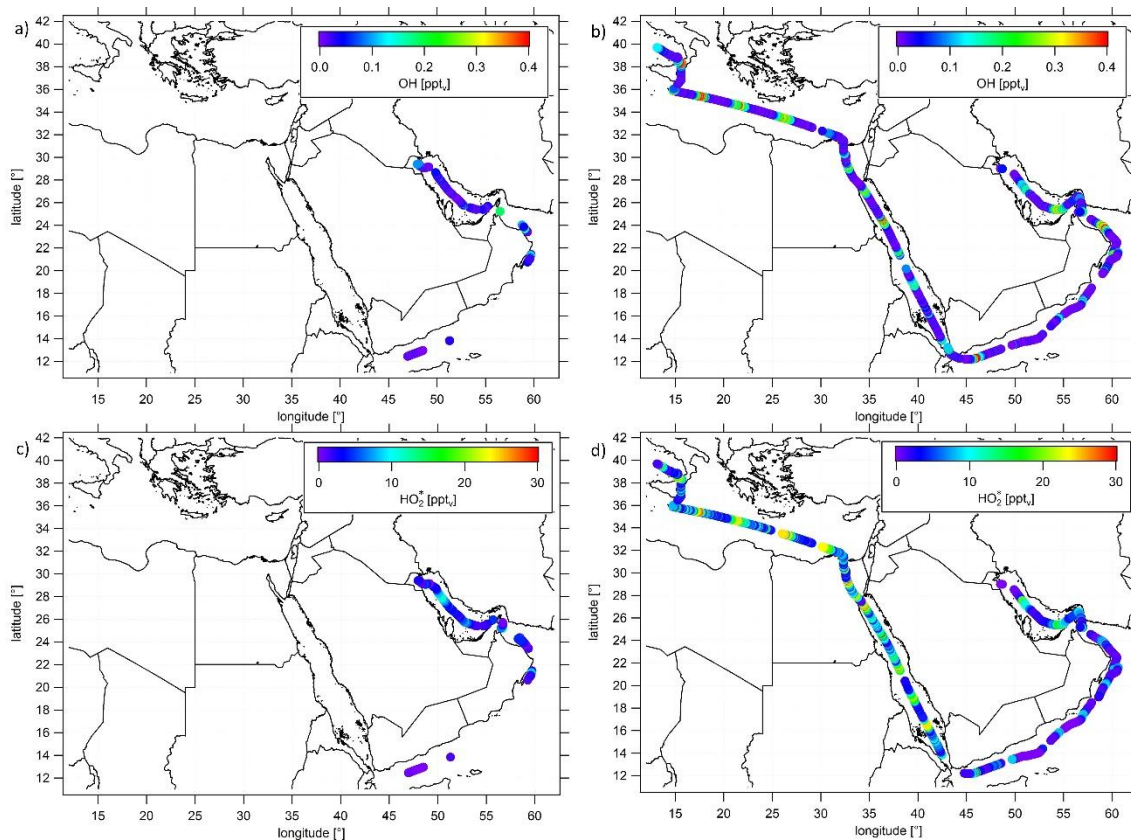

15

**Figure S4: Ship cruises with color-scaled OH mixing ratios a) during the first and b) the second leg and color-scaled HO<sub>2</sub><sup>\*</sup> mixing ratios c) during the first and d) the second leg. Note that OH and HO<sub>2</sub><sup>\*</sup> data have been filtered for own stack contamination.**

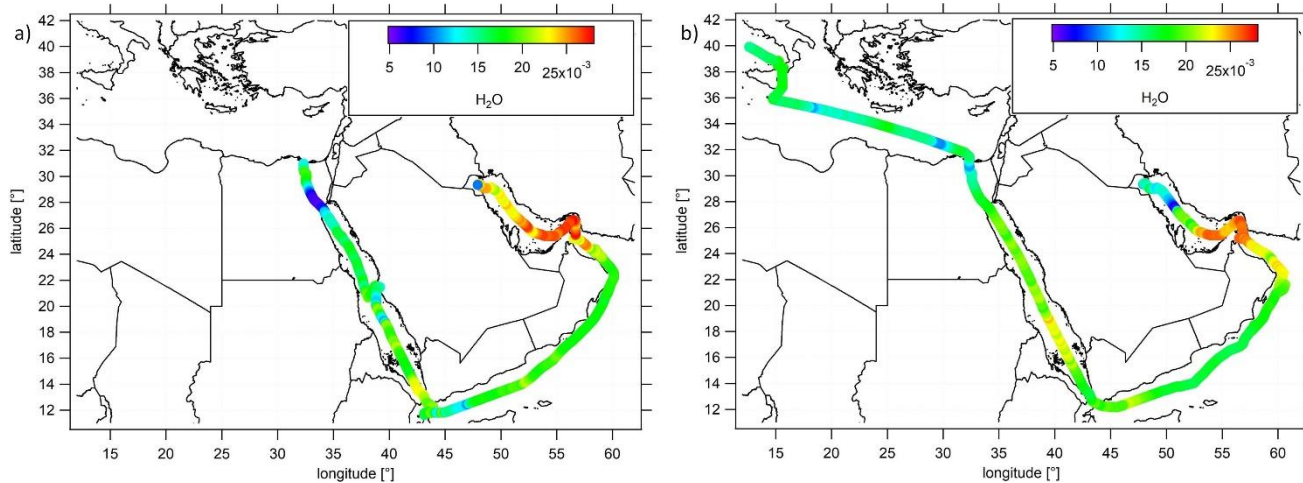

20

**Figure S5: Ship cruises with color-scaled absolute humidity a) during the first and b) the second leg.**

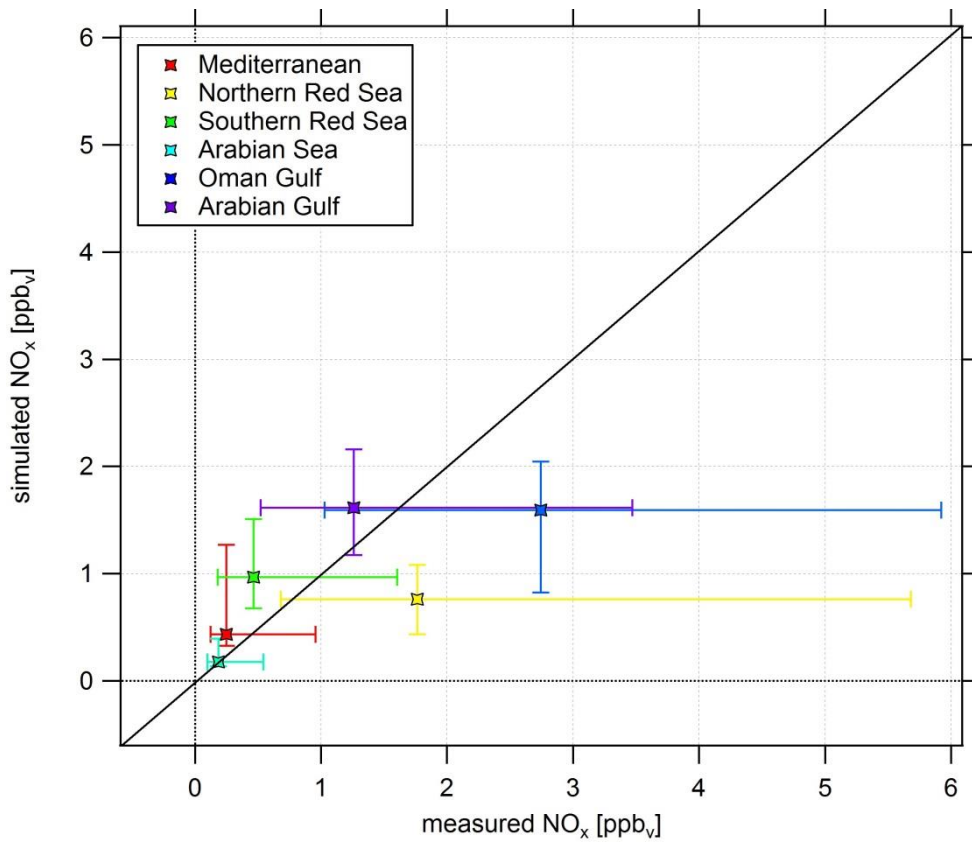

**Figure S6: Scatterplot of simulated and measured regional NO<sub>x</sub> median in ppbv. 1:1 line added for orientation. The error bars represent the 25-75-percentile variation.**

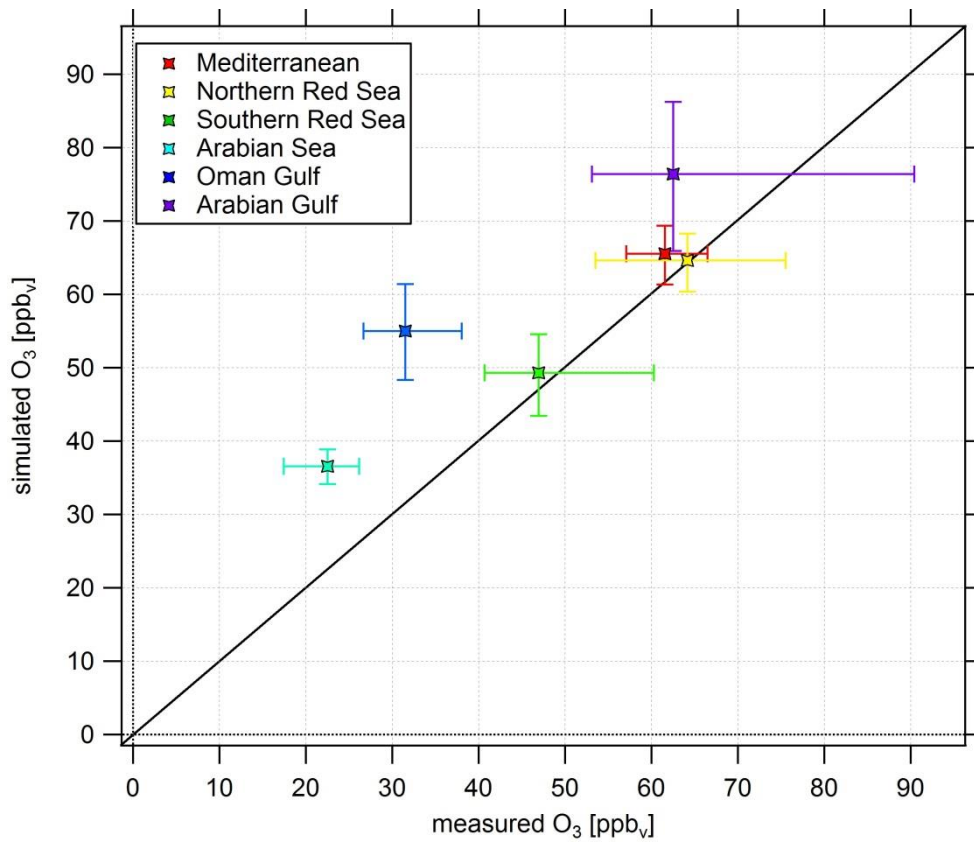

25

**Figure S7: Scatterplot of simulated and measured regional O<sub>3</sub> median in ppb<sub>v</sub>. 1:1 line added for orientation. The error bars represent the 25-75-percentile variation.**

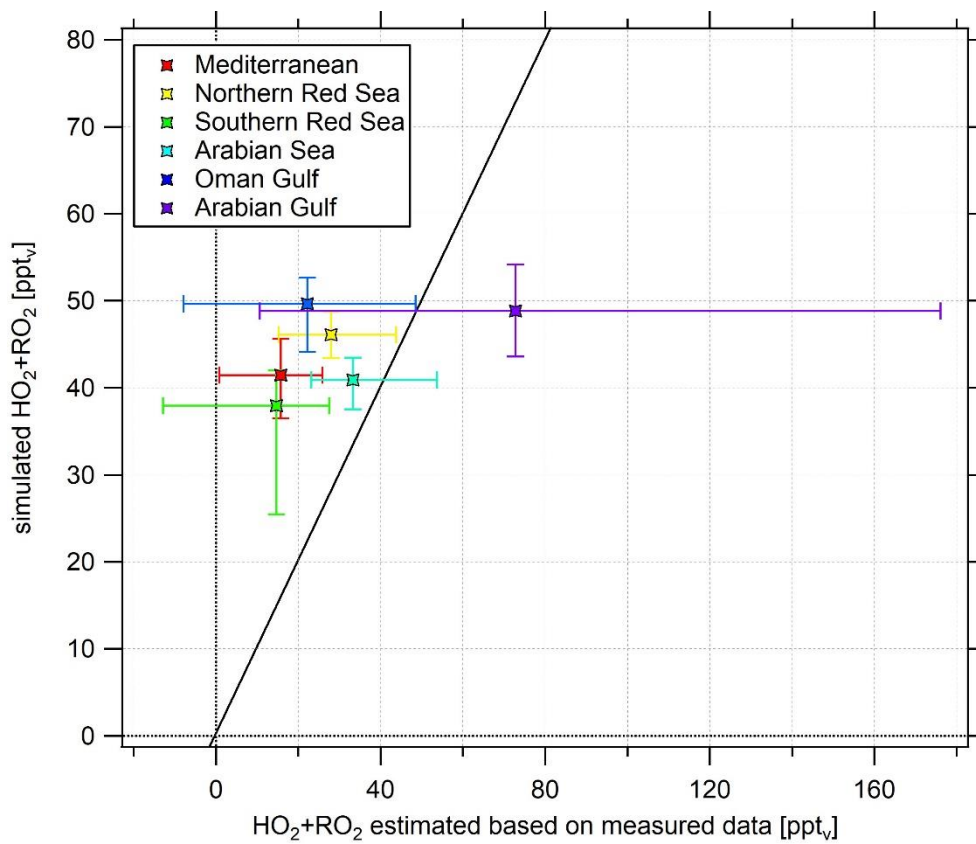

30 **Figure S8: Scatterplot of simulated regional ( $\text{HO}_2 + \text{RO}_2$ ) median and regional ( $\text{HO}_2 + \text{RO}_2$ ) median estimated based on measured tracer data in  $\text{ppt}_v$ . 1:1 line added for orientation. The error bars represent the 25-75-percentile variation.**

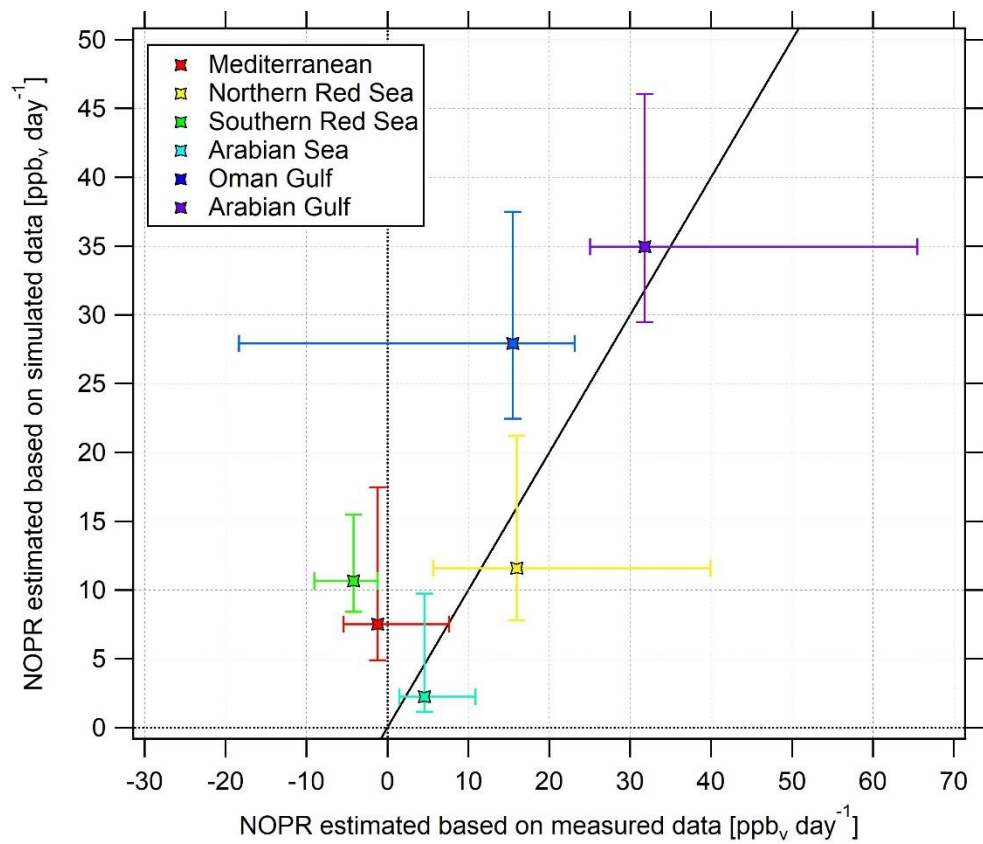

**Figure S9:** Scatterplot of median NOPR in ppb<sub>v</sub> day<sup>-1</sup> estimated based on simulated and measured tracer data. 1:1 line added for orientation. The error bars represent the 25-75-percentile variation.



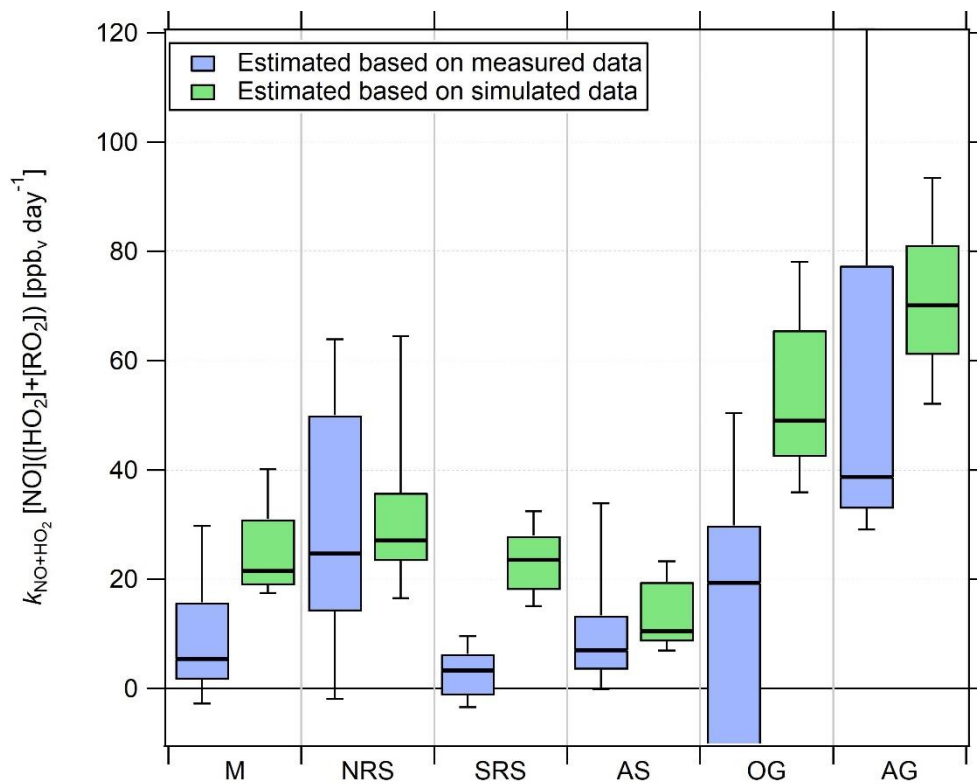

**Figure S10: Comparison of the regional, absolute contribution of  $k_{\text{NO}+\text{HO}_2}[\text{NO}][\text{HO}_2] + [\text{RO}_2]$  to NOPR in the six different regions investigated during AQABA. The horizontal black bar indicates the median value, the box the 25- and 75-percentiles and the whiskers the 10- and 90-percentiles.**

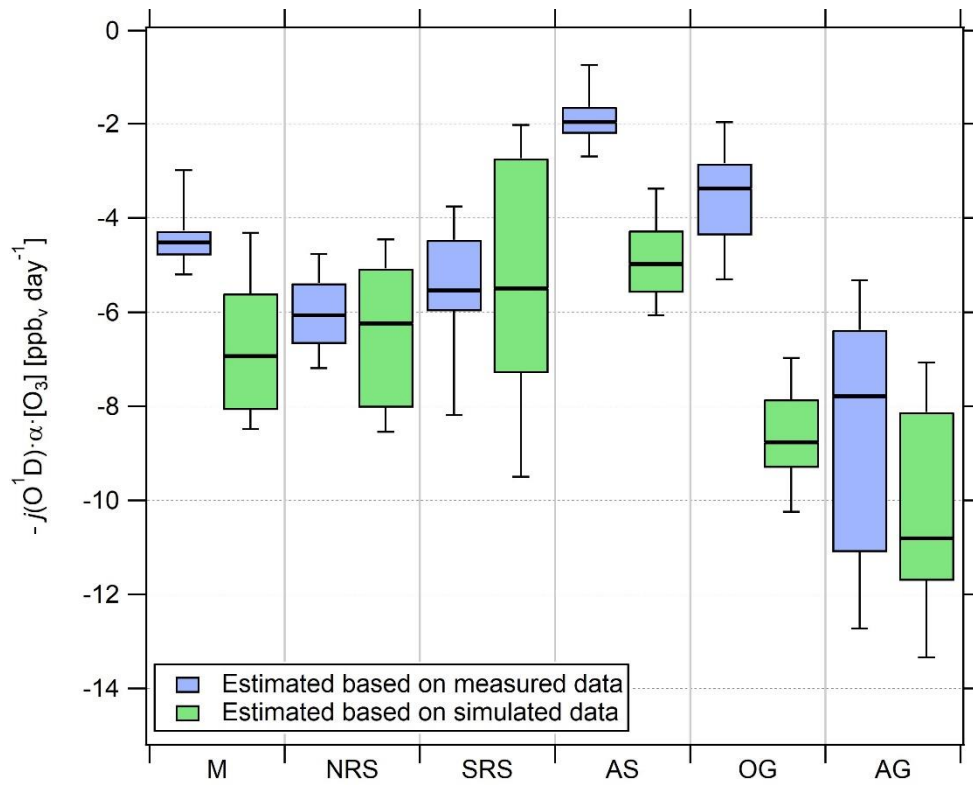

40

**Figure S11: Comparison of the regional, absolute contribution of  $-j(\text{O}^1\text{D}) \cdot \alpha \cdot [\text{O}_3]$  to NOPR in the six different regions investigated during AQABA. The horizontal black bar indicates the median value, the box the 25- and 75-percentiles and the whiskers the 10- and 90-percentiles.**

45

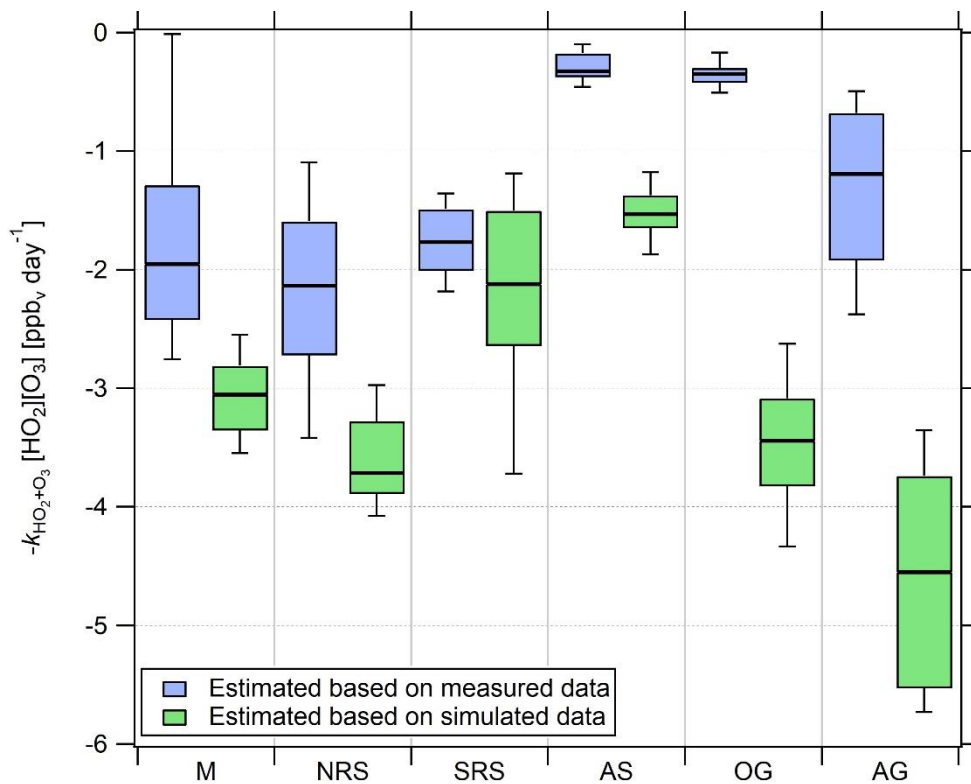

**Figure S12:** Comparison of the regional, absolute contribution of  $-k_{\text{HO}_2+\text{O}_3}[\text{HO}_2][\text{O}_3]$  to NOPR in the six different regions investigated during AQABA. The horizontal black bar indicates the median value, the box the 25- and 75-percentiles and the whiskers the 10- and 90-percentiles.

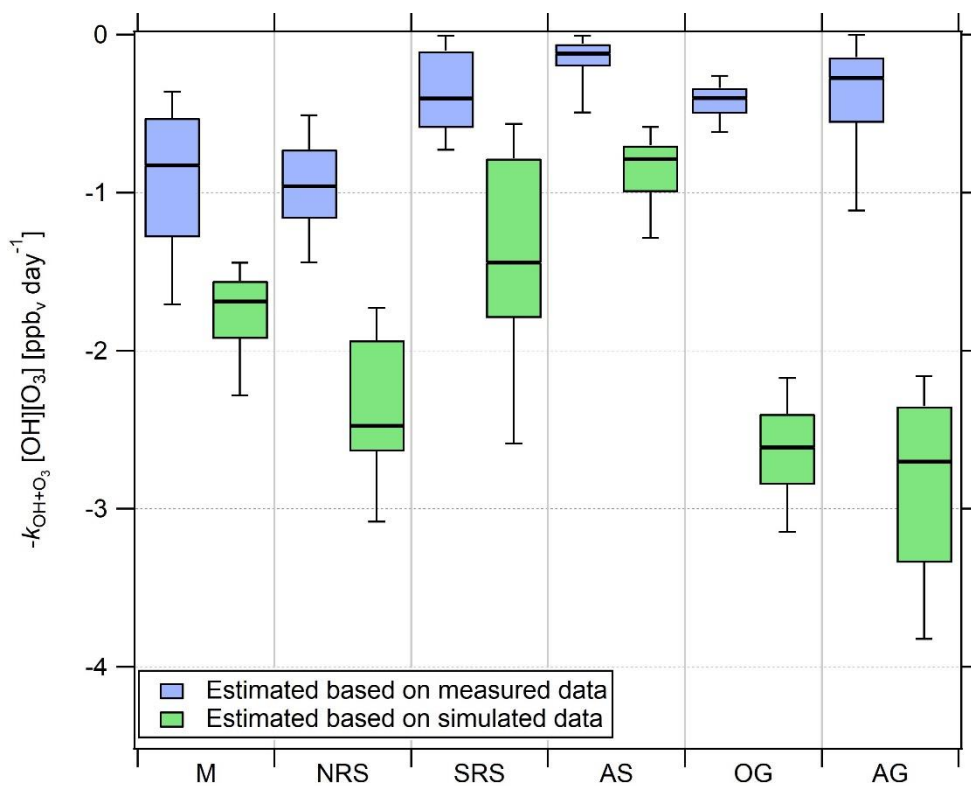

55 **Figure S13:** Comparison of the regional, absolute contribution of  $-k_{\text{OH}+\text{O}_3}[\text{OH}][\text{O}_3]$  to NOPR in the six different regions investigated during AQABA. The horizontal black bar indicates the median value, the box the 25- and 75-percentiles and the whiskers the 10- and 90-percentiles.

**Table ST1: Range of latitudinal and longitudinal coordinates and dates during both legs of the different regions.**

| region (abbreviation)     | latitudinal range       | longitudinal range      | Date (1 <sup>st</sup> leg) | Date (2 <sup>nd</sup> leg) |
|---------------------------|-------------------------|-------------------------|----------------------------|----------------------------|
| Mediterranean (M)         | 31.810° N-<br>39.923° N | 12.620° E-<br>31.850° E | ---                        | 25.08.2017 –<br>31.08.2017 |
| Northern Red Sea<br>(NRS) | 23.343° N-<br>30.986° N | 32.305° E-<br>37.085° E | 03.07.2017 –<br>08.07.2017 | 21.08.2017 –<br>24.08.2017 |
| Southern Red Sea<br>(SRS) | 12.672° N-<br>22.494° N | 37.411° E-<br>43.327° E | 09.07.2017 –<br>16.07.2017 | 17.08.2017 –<br>20.08.2017 |
| Arabian Sea (AS)          | 11.797° N-<br>22.782° N | 44.035° E-<br>60.636° E | 18.07.2017 –<br>24.07.2017 | 07.08.2017 –<br>16.08.2017 |
| Oman Gulf (OG)            | 23.050° N-<br>25.622° N | 56.492° E-<br>59.913° E | 24.07.2017 –<br>27.07.2017 | 05.08.2017 –<br>07.08.2017 |
| Arabian Gulf (AG)         | 25.396° N-<br>29.425° N | 47.920° E-<br>56.772° E | 27.07.2017 –<br>31.07.2017 | 03.08.2017 –<br>05.08.2017 |

60 Table ST2: Overview of the time spent in the particular regions during AQABA. Red color indicates periods with KI at anchor that are not included in the data analysis. Data measured during bunkering at Fujairah City (06 August, 07:00-15:00 UTC) were also not included in the analysis.

| Date       | Region                       | Date       | Region                   |
|------------|------------------------------|------------|--------------------------|
| 03.07.2017 | Northern Red Sea             | 02.08.2017 | Kuwait port              |
| 04.07.2017 | Northern Red Sea             | 03.08.2017 | Kuwait port/Arabian Gulf |
| 05.07.2017 | Northern Red Sea             | 04.08.2017 | Arabian Gulf             |
| 06.07.2017 | Northern Red Sea             | 05.08.2017 | Arabian Gulf/Oman Gulf   |
| 07.07.2017 | Northern Red Sea             | 06.08.2017 | Oman Gulf                |
| 08.07.2017 | Northern Red Sea             | 07.08.2017 | Oman Gulf/Arabian Sea    |
| 09.07.2017 | Southern Red Sea             | 08.08.2017 | Arabian Sea              |
| 10.07.2017 | Southern Red Sea             | 09.08.2017 | Arabian Sea              |
| 11.07.2017 | Southern Red Sea/Jeddah port | 10.08.2017 | Arabian Sea              |
| 12.07.2017 | Jeddah port                  | 11.08.2017 | Arabian Sea              |
| 13.07.2017 | Jeddah port/Southern Red Sea | 12.08.2017 | Arabian Sea              |
| 14.07.2017 | Southern Red Sea             | 13.08.2017 | Arabian Sea              |
| 15.07.2017 | Southern Red Sea             | 14.08.2017 | Arabian Sea              |
| 16.07.2017 | Southern Red Sea             | 15.08.2017 | Arabian Sea              |
| 17.07.2017 | Djibouti port                | 16.08.2017 | Arabian Sea              |
| 18.07.2017 | Arabian Sea                  | 17.08.2017 | Southern Red Sea         |
| 19.07.2017 | Arabian Sea                  | 18.08.2017 | Southern Red Sea         |
| 20.07.2017 | Arabian Sea                  | 19.08.2017 | Southern Red Sea         |
| 21.07.2017 | Arabian Sea                  | 20.08.2017 | Southern Red Sea         |
| 22.07.2017 | Arabian Sea                  | 21.08.2017 | Northern Red Sea         |
| 23.07.2017 | Arabian Sea                  | 22.08.2017 | Northern Red Sea         |
| 24.07.2017 | Arabian Sea/Oman Gulf        | 23.08.2017 | Northern Red Sea         |
| 25.07.2017 | Oman Gulf                    | 24.08.2017 | Northern Red Sea         |
| 26.07.2017 | Oman Gulf                    | 25.08.2017 | Mediterranean            |
| 27.07.2017 | Oman Gulf/Arabian Gulf       | 26.08.2017 | Mediterranean            |
| 28.07.2017 | Arabian Gulf                 | 27.08.2017 | Mediterranean            |
| 29.07.2017 | Arabian Gulf                 | 28.08.2017 | Mediterranean            |
| 30.07.2017 | Arabian Gulf                 | 29.08.2017 | Mediterranean            |
| 31.07.2017 | Arabian Gulf/Kuwait port     | 30.08.2017 | Mediterranean            |
| 01.08.2017 | Kuwait port                  | 31.08.2017 | Mediterranean            |

**Table ST3: Overview of measured NO<sub>x</sub> (upper table) and measured O<sub>3</sub> (lower table) spatial volume mixing ratio average, standard deviation, 1<sup>st</sup> quantile, median, 3<sup>rd</sup> quantile (all in ppb<sub>v</sub>) and number of considered data points.**

| NO <sub>x</sub> (upper),<br>O <sub>3</sub> (lower) | Mediterranea<br>n | Northern Red<br>Sea | Southern Red<br>Sea | Arabian Sea  | Oman Gulf    | Arabian Gulf |
|----------------------------------------------------|-------------------|---------------------|---------------------|--------------|--------------|--------------|
| data points                                        | 1767              | 1694                | 1755                | 2656         | 1056         | 1539         |
| average                                            | 1.24              | 4.69                | 1.62                | 0.95         | 4.16         | 3.65         |
| stdev                                              | 3.34              | 7.9                 | 3.7                 | 3.15         | 4.33         | 9.24         |
| 1 <sup>st</sup> quantile                           | 0.12              | 0.68                | 0.18                | 0.10         | 1.03         | 0.52         |
| median                                             | <b>0.25</b>       | <b>1.76</b>         | <b>0.46</b>         | <b>0.19</b>  | <b>2.74</b>  | <b>1.26</b>  |
| 3 <sup>rd</sup> quantile                           | 0.96              | 5.68                | 1.6                 | 0.54         | 5.92         | 3.47         |
| data points                                        | 2010              | 2717                | 2307                | 4130         | 1249         | 1809         |
| average                                            | <b>61.56</b>      | <b>63.39</b>        | <b>50.35</b>        | <b>21.53</b> | <b>34.04</b> | <b>73.99</b> |
| stdev                                              | 8.25              | 18.45               | 12.96               | 6.8          | 11.27        | 35.68        |
| 1 <sup>st</sup> quantile                           | 57.05             | 53.51               | 40.68               | 17.45        | 26.66        | 53.08        |
| median                                             | <b>61.54</b>      | <b>64.16</b>        | <b>46.93</b>        | <b>22.52</b> | <b>31.5</b>  | <b>62.5</b>  |
| 3 <sup>rd</sup> quantile                           | 66.48             | 75.51               | 60.28               | 26.19        | 38.03        | 90.42        |

65 **Table ST4: Overview of simulated NO<sub>x</sub> (upper table) and simulated O<sub>3</sub> (lower table) spatial volume mixing ratio average, standard deviation, 1<sup>st</sup> quantile, median, 3<sup>rd</sup> quantile (all in ppb<sub>v</sub>) and number of considered data points.**

| NO <sub>x</sub> (upper), O <sub>3</sub><br>(lower) | Mediterranea<br>n | Northern Red<br>Sea | Southern Red<br>Sea | Arabian Sea  | Oman Gulf    | Arabian Gulf |
|----------------------------------------------------|-------------------|---------------------|---------------------|--------------|--------------|--------------|
| data points                                        | 2012              | 2719                | 2310                | 4464         | 1253         | 1810         |
| average                                            | 0.84              | 1.27                | 1.13                | 0.31         | 1.88         | 1.91         |
| stdev                                              | 0.75              | 1.97                | 0.62                | 0.29         | 1.47         | 1.37         |
| 1 <sup>st</sup> quantile                           | 0.33              | 0.43                | 0.67                | 0.14         | 0.82         | 1.17         |
| median                                             | <b>0.43</b>       | <b>0.76</b>         | <b>0.97</b>         | <b>0.18</b>  | <b>1.59</b>  | <b>1.61</b>  |
| 3 <sup>rd</sup> quantile                           | 1.27              | 1.08                | 1.51                | 0.39         | 2.05         | 2.16         |
| data points                                        | 2012              | 2719                | 2310                | 4464         | 1253         | 1810         |
| average                                            | <b>65.15</b>      | <b>64.76</b>        | <b>49.5</b>         | <b>36.91</b> | <b>55</b>    | <b>76.85</b> |
| stdev                                              | 4.99              | 7.7                 | 7.21                | 3.87         | 9.94         | 12.8         |
| 1 <sup>st</sup> quantile                           | 61.35             | 60.34               | 43.47               | 34.12        | 48.37        | 65.88        |
| median                                             | <b>65.53</b>      | <b>64.6</b>         | <b>49.33</b>        | <b>36.54</b> | <b>55.01</b> | <b>76.39</b> |
| 3 <sup>rd</sup> quantile                           | 69.33             | 68.25               | 54.58               | 38.85        | 61.42        | 86.22        |

**Table ST5: Overview of noontime (HO<sub>2</sub>+RO<sub>2</sub>) spatial volume mixing ratio average, standard deviation, 1<sup>st</sup> quantile, median, 3<sup>rd</sup> quantile (all in ppt.) estimated based on measured tracer data. Number of considered data points added in the first line.**

| HO <sub>2</sub> +RO <sub>2</sub> | Mediterranean | Northern Red Sea | Southern Red Sea | Arabian Sea | Oman Gulf | Arabian Gulf |
|----------------------------------|---------------|------------------|------------------|-------------|-----------|--------------|
| data points                      | 288           | 126              | 190              | 338         | 166       | 242          |
| average                          | 13            | 27               | 7                | 64          | 23        | 94           |
| stdev                            | 24            | 20               | 34               | 83          | 42        | 113          |
| 1 <sup>st</sup> quantile         | 1             | 15               | -13              | 23          | -8        | 11           |
| median                           | <b>16</b>     | <b>28</b>        | <b>15</b>        | <b>33</b>   | <b>22</b> | <b>73</b>    |
| 3 <sup>rd</sup> quantile         | 26            | 44               | 27               | 54          | 49        | 176          |

70

**Table ST6: Overview of simulated noontime (HO<sub>2</sub>+RO<sub>2</sub>) spatial volume mixing ratio average, standard deviation, 1<sup>st</sup> quantile, median, 3<sup>rd</sup> quantile (all in ppt.). Number of considered data points added in the first line.**

| HO <sub>2</sub> +RO <sub>2</sub> | Mediterranean | Northern Red Sea | Southern Red Sea | Arabian Sea | Oman Gulf | Arabian Gulf |
|----------------------------------|---------------|------------------|------------------|-------------|-----------|--------------|
| data points                      | 336           | 192              | 192              | 720         | 203       | 293          |
| average                          | 41            | 46               | 36               | 40          | 48        | 49           |
| stdev                            | 5             | 4                | 11               | 5           | 6         | 7            |
| 1 <sup>st</sup> quantile         | 36            | 43               | 25               | 38          | 44        | 44           |
| median                           | <b>41</b>     | <b>46</b>        | <b>38</b>        | <b>41</b>   | <b>50</b> | <b>49</b>    |
| 3 <sup>rd</sup> quantile         | 46            | 49               | 42               | 43          | 53        | 54           |

75

**Table ST7: Overview of NOPR average, standard deviation, 1<sup>st</sup> quantile, median, 3<sup>rd</sup> quantile (all in ppbv day<sup>-1</sup>) estimated based on measured tracer data. Number of considered data points added in the first line.**

| NOPR                     | Mediterranean | Northern Red Sea | Southern Red Sea | Arabian Sea | Oman Gulf | Arabian Gulf |
|--------------------------|---------------|------------------|------------------|-------------|-----------|--------------|
| data points              | 148           | 114              | 89               | 187         | 84        | 111          |
| average                  | -3            | 16               | -5               | -67         | -105      | -24          |
| stdev                    | 43            | 39               | 12               | 576         | 362       | 449          |
| 1 <sup>st</sup> quantile | -5            | 6                | -9               | 1           | -18       | 25           |
| median                   | <b>-1</b>     | <b>16</b>        | <b>-4</b>        | <b>5</b>    | <b>16</b> | <b>32</b>    |
| 3 <sup>rd</sup> quantile | 8             | 40               | -1               | 11          | 23        | 65           |



**Table ST8: Overview of NOPR average, standard deviation, 1<sup>st</sup> quantile, median, 3<sup>rd</sup> quantile (all in ppbv day<sup>-1</sup>) estimated based on simulated tracer data. Number of considered data points added in the first line.**

| NOPR                     | Northern      |           | Southern  |             |           |              |
|--------------------------|---------------|-----------|-----------|-------------|-----------|--------------|
|                          | Mediterranean | Red Sea   | Red Sea   | Arabian Sea | Oman Gulf | Arabian Gulf |
| data points              | 336           | 192       | 192       | 720         | 203       | 293          |
| average                  | 11            | 16        | 12        | 5           | 30        | 38           |
| stdev                    | 8             | 12        | 6         | 6           | 11        | 10           |
| 1 <sup>st</sup> quantile | 5             | 8         | 8         | 1           | 22        | 30           |
| median                   | <b>8</b>      | <b>12</b> | <b>11</b> | <b>2</b>    | <b>28</b> | <b>35</b>    |
| 3 <sup>rd</sup> quantile | 17            | 21        | 15        | 10          | 37        | 46           |

80

**Table ST9: Overview of measured HCHO/NO<sub>2</sub>-ratio average, standard deviation, 1<sup>st</sup> quantile, median, 3<sup>rd</sup> quantile and number of considered data points.**

| Ratio                    | Mediterranea | Northern Red | Southern Red | Arabian Sea | Oman Gulf  | Arabian Gulf |
|--------------------------|--------------|--------------|--------------|-------------|------------|--------------|
|                          | n            | Sea          | Sea          |             |            |              |
| data points              | 203          | 79           | 48           | 252         | 108        | 122          |
| average                  | 5.4          | 1.5          | 8.5          | 11.1        | 2.7        | 9            |
| stdev                    | 4.7          | 0.7          | 6.5          | 8.9         | 2.1        | 6.4          |
| 1 <sup>st</sup> quantile | 1.3          | 0.8          | 4.4          | 2.3         | 1          | 2.5          |
| median                   | <b>5</b>     | <b>1.4</b>   | <b>7.7</b>   | <b>9.4</b>  | <b>2.2</b> | <b>9.3</b>   |
| 3 <sup>rd</sup> quantile | 7.4          | 2.1          | 9.8          | 16.1        | 3.6        | 12.7         |

85

**Table ST10: List of included peroxy radicals (with less than four carbon atoms) for the reaction with NO as recommended by Sander et al. (2019).**

| Species                                                           |
|-------------------------------------------------------------------|
| HO <sub>2</sub>                                                   |
| CH <sub>3</sub> O <sub>2</sub>                                    |
| C <sub>2</sub> H <sub>5</sub> O <sub>2</sub>                      |
| C <sub>2</sub> H <sub>5</sub> CO <sub>3</sub>                     |
| CH <sub>3</sub> CO <sub>3</sub>                                   |
| C3DIALO2 (C <sub>3</sub> H <sub>3</sub> O <sub>4</sub> )          |
| CH <sub>3</sub> CHOHO <sub>2</sub>                                |
| CH <sub>3</sub> COCH <sub>2</sub> O <sub>2</sub>                  |
| CH <sub>3</sub> COCO <sub>3</sub>                                 |
| CHOCOCH <sub>2</sub> O <sub>2</sub>                               |
| CO <sub>2</sub> H <sub>3</sub> CO <sub>3</sub>                    |
| HCOCH <sub>2</sub> CO <sub>3</sub>                                |
| HCOCH <sub>2</sub> O <sub>2</sub>                                 |
| HCOCO <sub>3</sub>                                                |
| HCOCOHCO <sub>3</sub>                                             |
| HOC <sub>2</sub> H <sub>4</sub> CO <sub>3</sub>                   |
| HOCH <sub>2</sub> CH <sub>2</sub> O <sub>2</sub>                  |
| HOCH <sub>2</sub> CO <sub>3</sub>                                 |
| HOCH <sub>2</sub> COCH <sub>2</sub> O <sub>2</sub>                |
| HOCH <sub>2</sub> O <sub>2</sub>                                  |
| CH <sub>3</sub> CHO <sub>2</sub> CH <sub>2</sub> OH               |
| IC3H7O2 (isopropylperoxy radical)                                 |
| NC3H7O2 (propylperoxy radical)                                    |
| NCCH <sub>2</sub> O <sub>2</sub>                                  |
| NO <sub>3</sub> CH <sub>2</sub> CO <sub>3</sub>                   |
| CH <sub>3</sub> CHO <sub>2</sub> CH <sub>2</sub> ONO <sub>2</sub> |
